# Supplementary material
Source: ML conference proceedings conference paper supplement (https://openaccess.thecvf.com/content/CVPR2024/html/Ma_Constructing_and_Exploring_CVPR_2024_paper.html)
Supplement: Supplementary file 1 [file Ma_Constructing_and_Exploring_CVPR_2024_supplemental.pdf]

# Constructing and Exploring Intermediate Domains in Mixed Domain Semi-supervised Medical Image Segmentation

## Supplementary Material

| Dataset  | Training |            | #Testing |
|----------|----------|------------|----------|
|          | #Labeled | #Unlabeled |          |
| Fundus   | 20       | 769        | 271      |
| Prostate | 40       | 1,470      | 357      |
| M&Ms     | 20       | 3,427      | 863      |

Table 1. Detailed partition information of three datasets. For each dataset, #Labeled, #Unlabeled, and #Testing indicate the number of labeled data, unlabeled data and test data, respectively.

### A. Detailed Dataset Partition

The detailed description of the datasets is shown in Tab. 1. In our setting, labeled data share a same distribution, while unlabeled data and testing set data come from multiple domains. Fundus dataset is inherently partitioned into training and testing sets. As for Prostate and M&Ms datasets, we employed a 4:1 ratio for the division.

### B. Visual Results of Prostate and M&Ms

Being consistent with Fundus dataset, we present visual results under different methods for Prostate and M&Ms datasets, as illustrated in Fig. 1 and Fig. 2, respectively. Due to error accumulation caused by distribution differ-

ences, many existing state-of-the-art methods exhibit inferior segmentation capabilities on test data with the same distribution as labeled data. Their performance degrades even further when tested on data from other domains. In contrast, our method demonstrates superior segmentation performance on test data from both the same and different domains as labeled data.

### C. Comparison with Methods Integrating Semi-supervised Medical Image Segmentation and Domain Adaptation

Semi-supervised medical image segmentation (SSMS) methods and domain adaptation (DA) methods address distinct challenges in the Mixed Domain Semi-supervised Medical Image Segmentation scenario. For a fair comparison, we integrate various DA methods with the SSMS approach and evaluate their performance. Utilizing FixMatch [4] as a baseline, we select FDA [5], CutMix [6], ClassMix [3], CowMix [1], and FMix [2] to facilitate domain knowledge transfer. Specifically, FDA involves style transfer from labeled to unlabeled data, while other methods blend images using masks of different shapes. The

Table 2. Comparison of different methods on Fundus dataset. + denotes we employ this method based on FixMatch. #L represents the number of labeled samples.  $\uparrow$  indicates that a higher value corresponds to better performance, while  $\downarrow$  suggests the opposite. The best performance is marked as **bold**, and the second-best is underlined.

| Task      |    | Optic Cup / Disc Segmentation |                             |                             |                             |               |               |                 |                  |
|-----------|----|-------------------------------|-----------------------------|-----------------------------|-----------------------------|---------------|---------------|-----------------|------------------|
| Method    | #L | DC $\uparrow$                 |                             |                             |                             | DC $\uparrow$ | JC $\uparrow$ | HD $\downarrow$ | ASD $\downarrow$ |
|           |    | Domain 1                      | Domain 2                    | Domain 3                    | Domain 4                    | Avg.          | Avg.          | Avg.            | Avg.             |
| FixMatch  | 20 | 81.18 / 91.29                 | 72.04 / 87.60               | 80.41 / 92.95               | 74.58 / 87.07               | 83.39         | 73.48         | 11.77           | 5.60             |
| +FDA      | 20 | 82.59 / 92.80                 | 74.34 / 88.63               | 80.08 / 92.64               | 77.66 / 88.99               | 84.72         | 75.33         | 10.38           | 4.82             |
| +CutMix   | 20 | <u>83.62</u> / 92.75          | 71.45 / 88.69               | 82.09 / 92.23               | 80.57 / 93.30               | 85.59         | 76.32         | 9.61            | 4.71             |
| +ClassMix | 20 | 71.35 / 89.47                 | <u>76.25</u> / 89.54        | 83.01 / 90.95               | 81.41 / 92.81               | 84.35         | 75.02         | 10.84           | 5.59             |
| +CowMix   | 20 | 83.54 / 92.72                 | 71.76 / 88.42               | <u>83.15</u> / 92.13        | <u>83.05</u> / 93.13        | <u>85.99</u>  | <u>77.07</u>  | 9.28            | 4.56             |
| +FMix     | 20 | 81.88 / <u>92.90</u>          | 72.96 / 89.10               | 82.41 / 92.80               | 82.19 / <u>93.33</u>        | 85.95         | 76.80         | 9.26            | <u>4.52</u>      |
| Ours      | 20 | <b>83.71</b> / <b>92.96</b>   | <b>80.47</b> / <b>89.93</b> | <b>84.18</b> / <b>92.97</b> | <b>83.71</b> / <b>93.38</b> | <b>87.66</b>  | <b>79.10</b>  | <b>8.21</b>     | <b>3.89</b>      |

Table 3. Comparison of different methods on Prostate dataset.

| Task      |    | Prostate Segmentation |              |              |              |              |              |               |               |                 |                  |
|-----------|----|-----------------------|--------------|--------------|--------------|--------------|--------------|---------------|---------------|-----------------|------------------|
| Method    | #L | DC $\uparrow$         |              |              |              |              |              | DC $\uparrow$ | JC $\uparrow$ | HD $\downarrow$ | ASD $\downarrow$ |
|           |    | RUNMC                 | BMC          | HCRUDB       | UCL          | BIDMC        | HK           | Avg.          | Avg.          | Avg.            | Avg.             |
| FixMatch  | 40 | 83.58                 | 69.17        | 73.63        | 79.21        | 56.07        | 84.78        | 74.41         | 65.96         | 24.18           | 14.09            |
| +FDA      | 40 | 77.78                 | 80.89        | 57.47        | 85.07        | 33.31        | 78.96        | 68.91         | 63.13         | 40.35           | 21.77            |
| +CutMix   | 40 | 86.97                 | <u>85.23</u> | 81.63        | 87.26        | 87.62        | <u>85.39</u> | 85.68         | <u>78.10</u>  | 12.77           | 5.94             |
| +ClassMix | 40 | 85.02                 | 69.16        | 69.06        | 85.32        | 43.16        | 76.03        | 71.29         | 60.70         | 57.52           | 28.24            |
| +CowMix   | 40 | 86.45                 | 85.05        | 83.68        | <u>87.75</u> | <u>88.20</u> | 84.41        | <u>85.92</u>  | 78.03         | <u>12.56</u>    | <u>5.32</u>      |
| +FMix     | 40 | <u>87.59</u>          | 84.80        | <u>84.95</u> | <u>87.10</u> | 88.15        | 75.48        | 84.19         | 76.37         | 14.54           | 6.55             |
| Ours      | 40 | <b>88.76</b>          | <b>86.35</b> | <b>87.61</b> | <b>88.34</b> | <b>88.62</b> | <b>88.20</b> | <b>87.98</b>  | <b>80.21</b>  | <b>10.36</b>    | <b>4.20</b>      |

Table 4. Comparison of different methods on M&amp;Ms dataset.

| Task      | LV / MYO / RV Segmentation |                                     |                                            |                                            |                                            |               |               |                 |                  |  |  |  |
|-----------|----------------------------|-------------------------------------|--------------------------------------------|--------------------------------------------|--------------------------------------------|---------------|---------------|-----------------|------------------|--|--|--|
|           | #L                         | DC $\uparrow$                       |                                            |                                            |                                            | DC $\uparrow$ | JC $\uparrow$ | HD $\downarrow$ | ASD $\downarrow$ |  |  |  |
|           |                            | Vendor A                            | Vendor B                                   | Vendor C                                   | Vendor D                                   | Avg.          | Avg.          | Avg.            | Avg.             |  |  |  |
| FixMatch  | 20                         | 87.26 / 77.78 / 77.14               | 91.06 / 82.78 / 79.07                      | 87.84 / 80.07 / 78.03                      | 90.86 / 81.75 / 81.84                      | 82.96         | 73.99         | 6.21            | 3.51             |  |  |  |
| +FDA      | 20                         | 85.22 / 75.40 / 76.30               | 89.91 / 81.59 / 78.93                      | 85.26 / 77.32 / 74.44                      | 89.74 / 81.60 / 80.20                      | 81.33         | 72.12         | 7.09            | 4.07             |  |  |  |
| +CutMix   | 20                         | 86.87 / 76.90 / <u>80.01</u>        | 91.12 / 82.04 / 79.94                      | 87.65 / 81.31 / <u>80.42</u>               | 90.06 / 81.73 / 81.60                      | <u>83.30</u>  | <u>74.45</u>  | <u>5.53</u>     | <u>2.87</u>      |  |  |  |
| +ClassMix | 20                         | 65.81 / 66.18 / 73.98               | 89.84 / 81.48 / <u>80.94</u>               | <u>88.22</u> / 81.96 / 80.00               | 85.87 / 79.02 / 80.51                      | 79.48         | 70.02         | 16.98           | 8.41             |  |  |  |
| +CowMix   | 20                         | 87.16 / <b>78.25</b> / 78.46        | 91.10 / 82.65 / 77.98                      | 87.43 / 80.45 / 79.20                      | 90.38 / 81.28 / 80.71                      | 82.92         | 73.80         | 6.37            | 3.48             |  |  |  |
| +FMix     | 20                         | 86.44 / 75.16 / 79.42               | <u>91.20</u> / 82.84 / 79.34               | 87.65 / 81.05 / 80.39                      | 90.39 / 81.72 / 81.57                      | 83.10         | 73.87         | 5.78            | 2.93             |  |  |  |
| Ours      | 20                         | <b>87.77</b> / 76.36 / <b>80.65</b> | <b>91.48</b> / <b>83.68</b> / <b>81.46</b> | <b>89.25</b> / <b>82.65</b> / <b>82.27</b> | <b>90.91</b> / <b>82.34</b> / <b>82.86</b> | <b>84.31</b>  | <b>75.18</b>  | <b>5.15</b>     | <b>2.42</b>      |  |  |  |

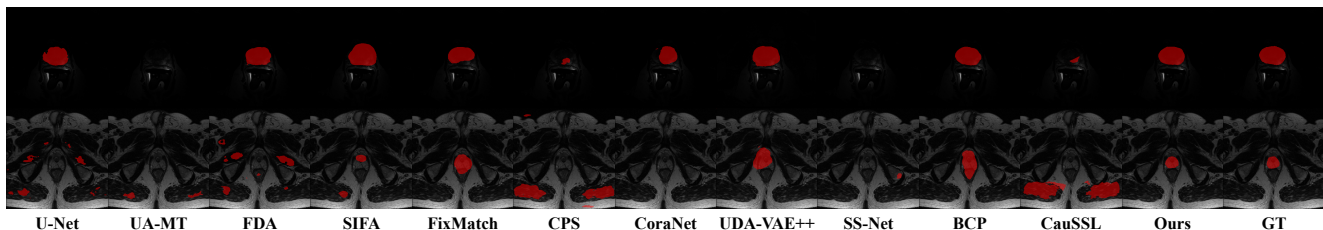

Figure 1. Visual results from Prostate dataset.

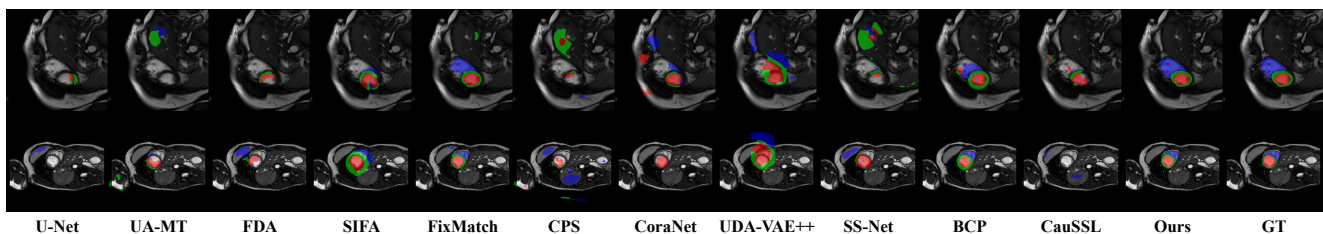

Figure 2. Visual results from M&amp;Ms dataset. Red, green and blue represent LV, MYO and RV, respectively.

results on three datasets are presented in Tabs. 2 to 4. In experiments on the Prostate dataset, we observed a significant performance drop when combining FDA and ClassMix with FixMatch. This emphasizes the necessity of thoughtfully selecting and combining of DA strategies to address the challenges posed by domain shift in SSMS. Additionally, the combination of CutMix and FMix with FixMatch consistently achieves superior performance on all three datasets. While constructing intermediate domains through local semantic mixing helps mitigate the adverse effects of the domain gap, the intermediate domains information has not been fully utilized. Moreover, it is crucial to note that a comprehensive intermediate domains construction should not be confined solely to mixing local semantics. Taking these observations into account, our method outperforms other methods on all three datasets.

## References

- [1] Geoff French, Avital Oliver, and Tim Salimans. Milking cow-mask for semi-supervised image classification. *arXiv preprint arXiv:2003.12022*, 2020. 1
- [2] Ethan Harris, Antonia Marcu, Matthew Painter, Mahesan Niranjan, Adam Prügel-Bennett, and Jonathon Hare. Fmix: Enhancing mixed sample data augmentation. *arXiv preprint arXiv:2002.12047*, 2020. 1
- [3] Viktor Olsson, Wilhelm Tranheden, Juliano Pinto, and Lennart Svensson. Classmix: Segmentation-based data augmentation for semi-supervised learning. In *IEEE Winter Conference on Applications of Computer Vision*, pages 1369–1378, 2021. 1
- [4] Kihyuk Sohn, David Berthelot, Nicholas Carlini, Zizhao Zhang, Han Zhang, Colin A Raffel, Ekin Dogus Cubuk, Alexey Kurakin, and Chun-Liang Li. Fixmatch: Simplifying semi-supervised learning with consistency and confidence. *Advances in Neural Information Processing Systems*, 33:596–608, 2020. 1
- [5] Yanchao Yang and Stefano Soatto. Fda: Fourier domain adaptation for semantic segmentation. In *Proceedings of the IEEE/CVF Conference on Computer Vision and Pattern Recognition*, pages 4085–4095, 2020. 1
- [6] Sangdoon Yun, Dongyoon Han, Seong Joon Oh, Sanghyuk Chun, Junsuk Choe, and Youngjoon Yoo. Cutmix: Regularization strategy to train strong classifiers with localizable features. In *Proceedings of the IEEE/CVF International Conference on Computer Vision*, pages 6023–6032, 2019. 1
